# Supplementary material
Source: PubMed Central journal article supplement (PMC2672419)

MD8

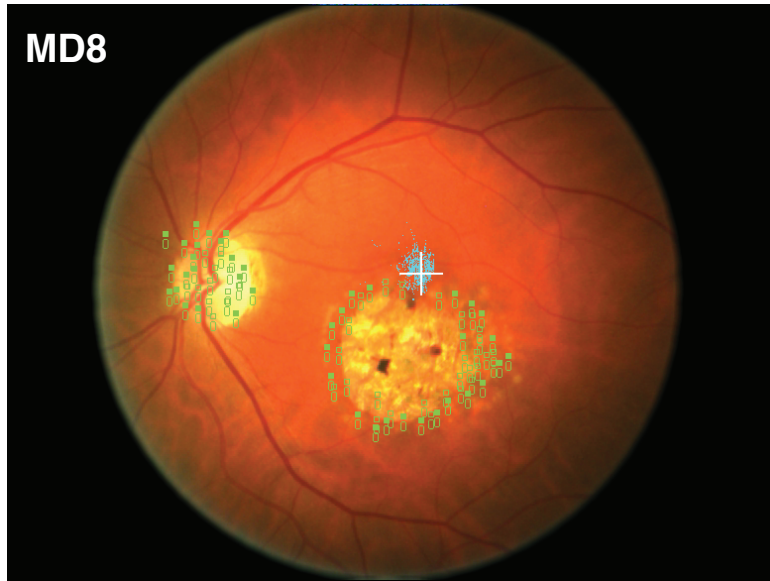

MD1

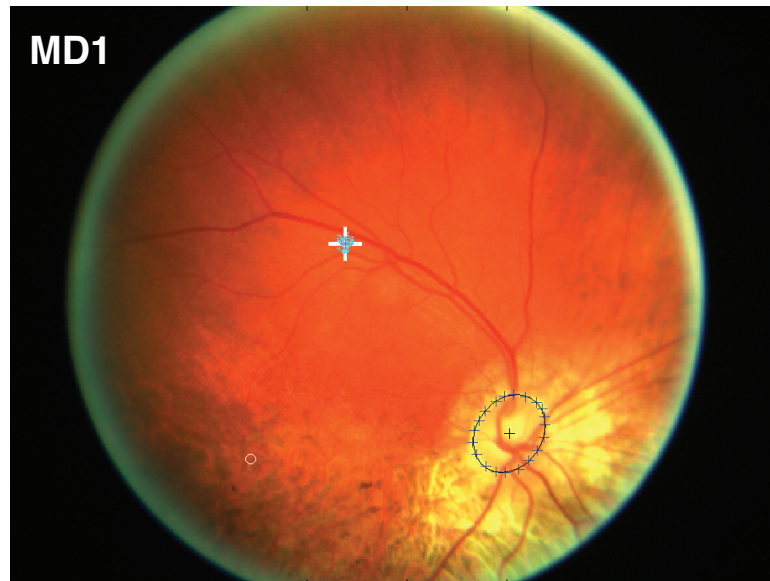

Supplement: NIHMS99590-supplement-Supp2.pdf [file NIHMS99590-supplement-Supp2.pdf]

**MD8**

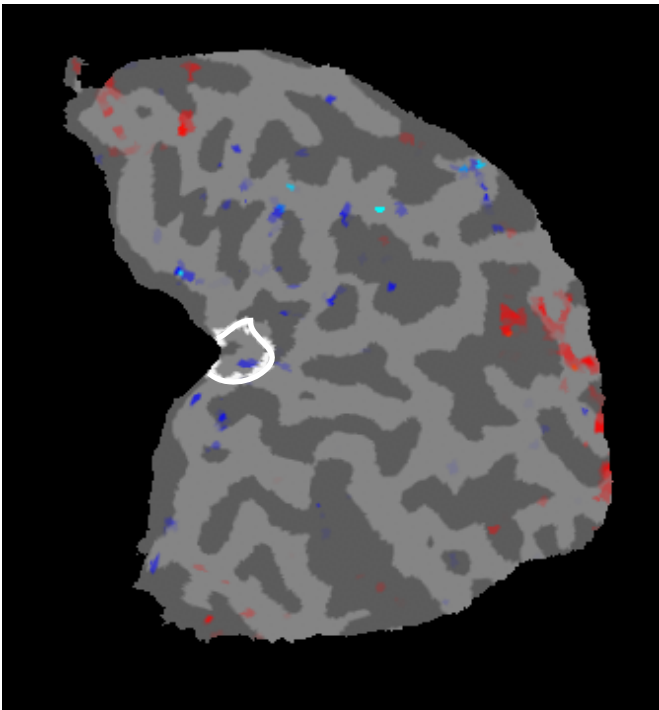

**MD8  
Control**

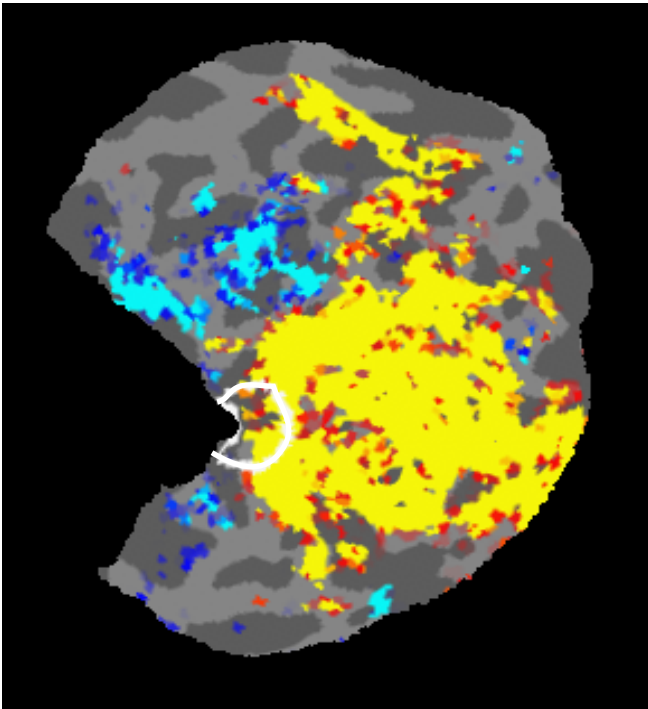

**MD1**

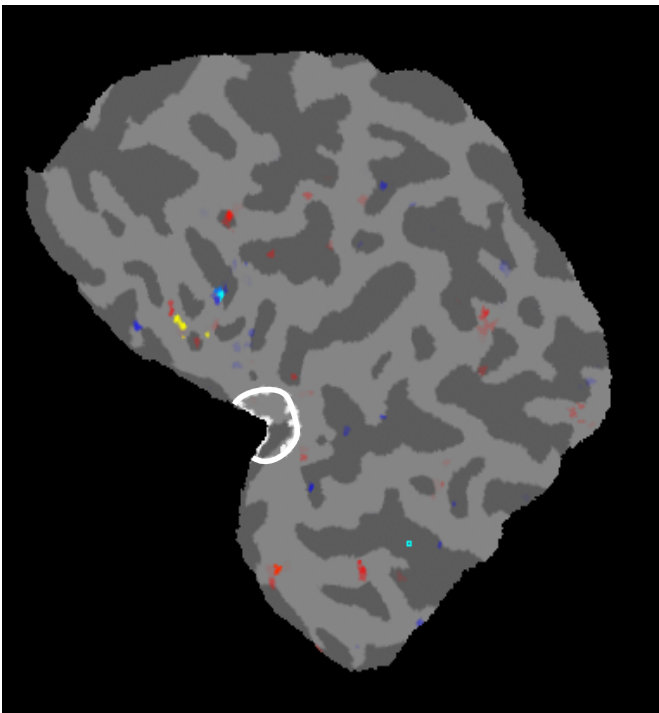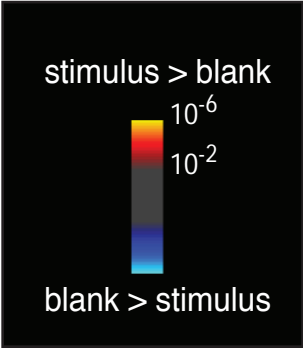

Supplement: NIHMS99590-supplement-Supp3.pdf [file NIHMS99590-supplement-Supp3.pdf]

MD8

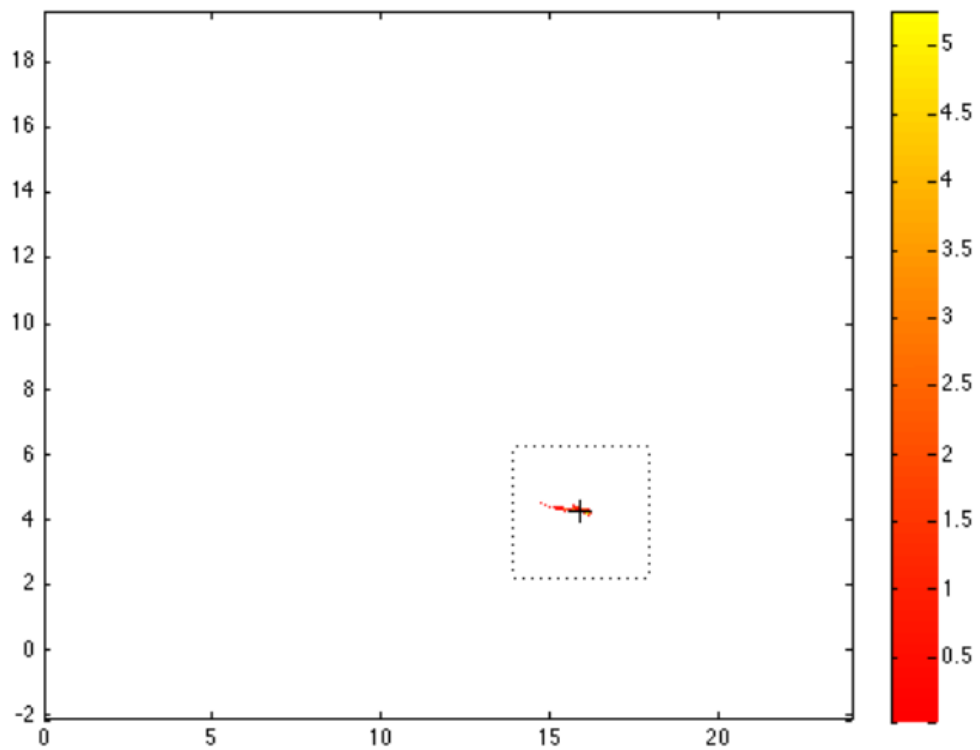

MD1

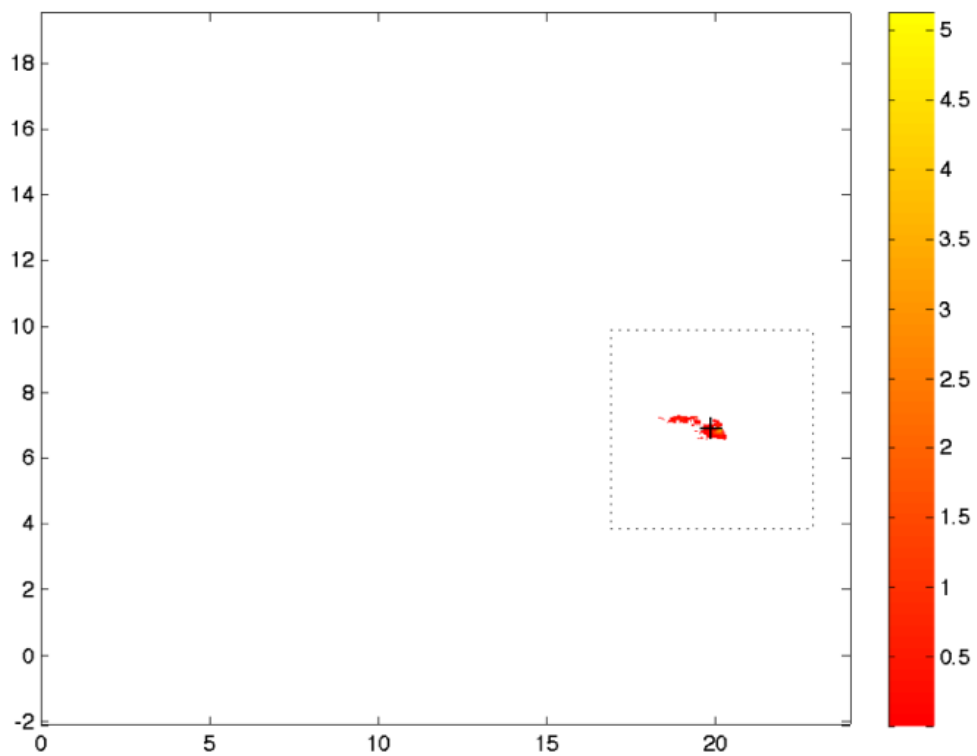

Supplement: NIHMS99590-supplement-Supp4.pdf [file NIHMS99590-supplement-Supp4.pdf]
